# Supplementary material for: Knowledge, Attitudes, and Beliefs About Opioid Use Disorder Treatment in Primary Care
Source: PubMed Central journal article supplement (PMC11214109; doi:10.1001/jamanetworkopen.2024.19094), 2024-06-28
Supplement: jamanetwopen-e2419094-s002.pdf [file jamanetwopen-e2419094-s002.pdf]

## Data Sharing Statement

del Pozo. Knowledge, Attitudes, and Beliefs About Opioid Use Disorder Treatment in Primary Care. *JAMA Netw Open*. Published June 28, 2024. doi:10.1001/jamanetworkopen.2024.19094

### Data

**Data available:** Yes

**Data types:** Deidentified participant data

**How to access data:** Please email Dr. Bruce Taylor at taylor-[bruce@norc.org](mailto:bruce@norc.org) to request the data.

**When available:** With publication

### Supporting Documents

**Document types:** None

### Additional Information

**Who can access the data:** Anyone requesting.

**Types of analyses:** Any purpose.

**Mechanisms of data availability:** Without support.

**Any additional restrictions:** None.
